# Supplementary material for: Using Light as a Medium to Convey Its Dark Side—A Light Festival Case Study
Source: Preprints.org preprint supplement (doi:10.20944/preprints202407.1536.v1), 2024-07-18
Supplement: Supplementary file 1 [file supplementary]

**Supplementary Information Table S1.** Summary of demographic and background variables for the different groups of participants, and tests of differences (diff) between the groups.

|  |  |  | **Group B: Did not visit Te Ramaroa** | **Group A: Did visit  Te Ramaroa** | | | **Difference  Visit vs  Not visit  (A vs B)** | **Difference Scope vs  Not Scope (A1 vs A2)** |
| --- | --- | --- | --- | --- | --- | --- | --- | --- |
|  |  | **Total (A + B)** | **Overall (B)** | **Overall (A)** | **Te Ramaroa but Not Scope (A2)** | **Te Ramaroa + Scope (A1)** |  |  |
| **Number of respondents** | | 329 (100%) | 107 (32.5%) | 222 (67.5%) | 115 (35.0%) | 107 (32.5%) |  |  |
| **Gender** | |  |  |  |  |  | X2 = 5.4 p = 0.14 | X2 = 6.2 p = 0.09 |
|  | **Male** | 86 | 21 | 65 | 27 | 38 |  |  |
|  | **Female** | 232 | 84 | 148 | 81 | 67 |  |  |
|  | **Other/ Prefer not to say** | 11 | 2 | 9 | 7 | 2 |  |  |
| **Age** | |  |  |  |  |  | Z = 1.49 p = 0.14 | Z = 0.45 p = 0.65 |
|  | **Median age** | 45 | 50 | 45 | 45 | 45 |  |  |
|  | **Interquartile range age** | 30-55 | 35-55 | 30-55 | 30-55 | 25-55 |  |  |
| **Education qualification** | |  |  |  |  |  | Z = 0.83 p = 0.40 | Z = 0.74 p = 0.46 |
|  | **None** | 27 | 6 | 21 | 11 | 10 |  |  |
|  | **High school** | 75 | 25 | 50 | 22 | 28 |  |  |
|  | **Undergrad certificate** | 61 | 22 | 39 | 22 | 17 |  |  |
|  | **Undergrad degree** | 101 | 29 | 72 | 38 | 34 |  |  |
|  | **Post-grad degree** | 65 | 25 | 40 | 22 | 18 |  |  |
| **Ethnicity** | |  |  |  |  |  | X2 = 4.80 p = 0.60 | X2 = 6.94 p = 0.34 |
|  | **NZ European** | 246 | 76 | 170 | 93 | 77 |  |  |
|  | **Other European** | 37 | 10 | 27 | 11 | 16 |  |  |
|  | **Māori** | 35 | 12 | 23 | 13 | 10 |  |  |
|  | **Other** | 25 | 9 | 16 | 9 | 7 |  |  |
|  | **Asia** | 12 | 3 | 9 | 2 | 7 |  |  |
|  | **Pasifika** | 4 | 1 | 3 | 1 | 2 |  |  |
|  | **Prefer not to say** | 10 | 6 | 4 | 1 | 3 |  |  |
| **Work times** | |  |  |  |  |  | X2 = 0.79 p = 0.87 | X2 = 5.94 p = 0.12 |
|  | **Daytime** | 264 | 88 | 176 | 92 | 84 |  |  |
|  | **Night time** | 7 | 2 | 5 | 3 | 2 |  |  |
|  | **Some day, some night (shifts)** | 17 | 6 | 11 | 2 | 9 |  |  |
|  | **Not employed** | 41 | 11 | 30 | 18 | 12 |  |  |
| **Connectedness to nature** | |  |  |  |  |  | Z = 1.19 p = 0.24 | Z =-1.08 p = 0.28 |
|  | **1** | 3 | 1 | 2 | 1 | 1 |  |  |
|  | **2** | 69 | 23 | 46 | 28 | 18 |  |  |
|  | **3** | 117 | 31 | 86 | 43 | 43 |  |  |
|  | **4** | 97 | 34 | 63 | 31 | 32 |  |  |
|  | **5** | 43 | 18 | 25 | 12 | 13 |  |  |
| **Urban-rural gradient** | |  |  |  |  |  | Z = 3.95 p < 0.001 | Z = 0.50 p = 0.618 |
|  | **Inner city** | 51 | 11 | 40 | 20 | 20 |  |  |
|  | **Suburban** | 172 | 52 | 120 | 61 | 59 |  |  |
|  | **Peri-urban** | 45 | 11 | 34 | 18 | 16 |  |  |
|  | **Rural settlement** | 42 | 19 | 23 | 14 | 9 |  |  |
|  | **Other rural** | 19 | 14 | 5 | 2 | 3 |  |  |
